# Supplementary material for: TiN catalyst for the reversible hydrogen storage performance of sodium alanate system
Source: Royal Society of Chemistry journal article supplement (doi:10.1039/c2jm31388j), 2012-01-01
Supplement: c2jm31388j.pdf [file c2jm31388j.pdf]

## Supporting Information

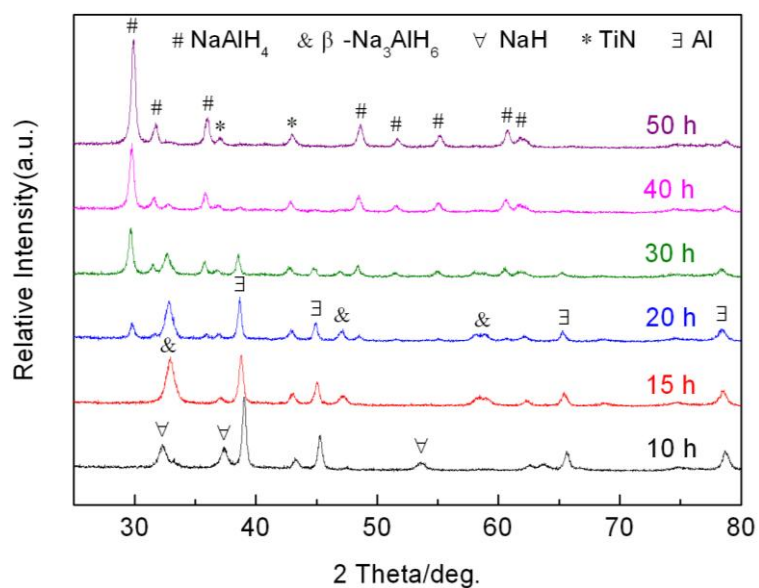

**Fig. S1** XRD patterns of the as-synthesized TiN-doped  $\text{NaAlH}_4$  at different milling times.

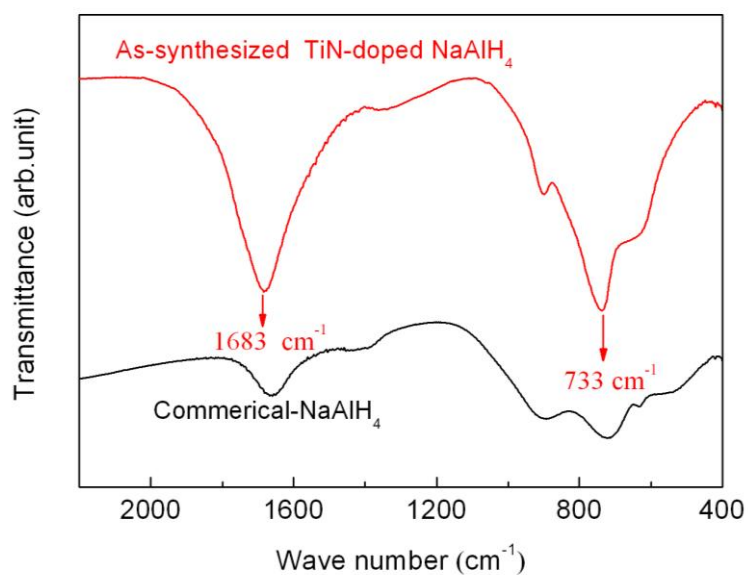

**Fig. S2** FTIR spectra of as-synthesized TiN-doped  $\text{NaAlH}_4$  and commercial- $\text{NaAlH}_4$ .

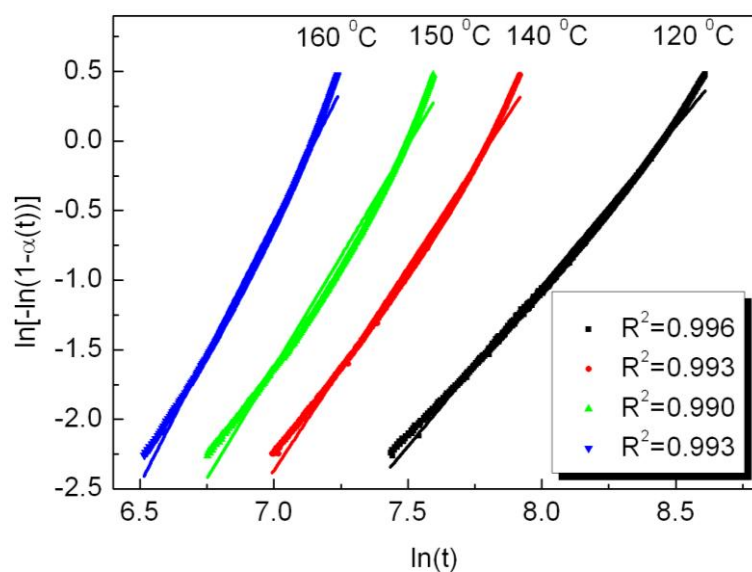

**Fig. S3** JMA plots for the first-step isothermal dehydrogenation.

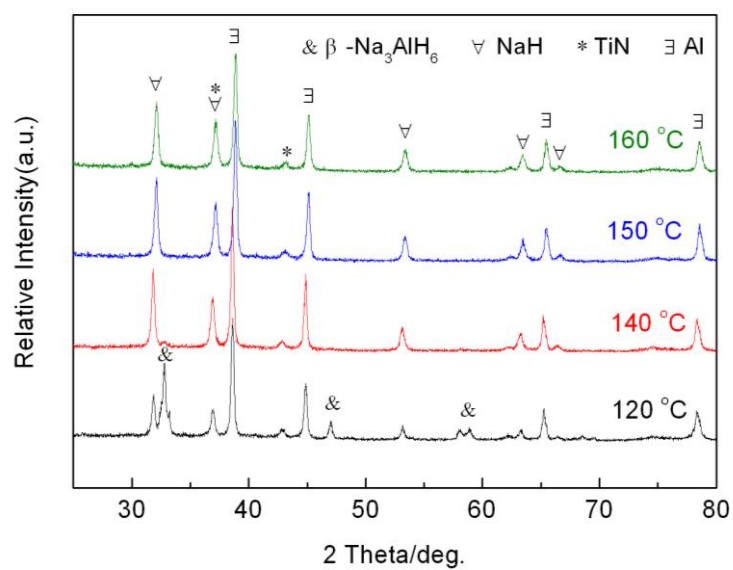

**Fig. S4** The dehydrogenated TiN-doped NaAlH<sub>4</sub> sample at different stages.
